# Supplementary material for: Optimal Experimental Design for Parameter Estimation of a Cell Signaling Model
Source: PLoS Comput Biol. 2009 Nov 6;5(11):e1000558. doi: 10.1371/journal.pcbi.1000558 (PMC2775273; doi:10.1371/journal.pcbi.1000558)
Supplement: Table S1 — Estimates for calibration parameters. (0.11 MB XLS) [file pcbi.1000558.s001.xls]

## Sheet: Sheet1
Parameter	traditional		+1st optimized		+2nd optimized
	p1	σ1	p2	σ2	p3	σ3
[Lyn]tot,1 / AU	0.91	0.1	0.9	0.1	60	5000
[p85]tot,1 / AU	1.13	0.08	1.13	0.08	1.55	0.08
[PH]tot,1 / AU	0.98	0.02	0.97	0.02	0.99	0.02
β1 / AU					0.37	0.03
[Lyn]tot,2 / AU			1	0.12	54	6000
[p85]tot,2 / AU			1.42	0.11	1.39	0.1
[PH]tot,2 / AU			0.7	0.03	0.72	0.03
LY29err / μM			0.003	0.51	0.25	0.51
β2					0.3	0.04
[Lyn]tot,3 / AU					129	14000
[p85]tot,3 / AU					0.49	0.09
[PH]tot,3 / AU					0.72	0.04
β3					0.29	0.07
